# Supplementary material for: TNFSF15 and MIA Variant Associated with Immunotherapy and Prognostic Evaluation in Esophageal Cancer
Source: Hindawi journal article supplement (doi:10.1155/2023/1248024), 2023-03-10

**A**

Module membership vs gene significance  
cor=0.45, p=7.3e-12

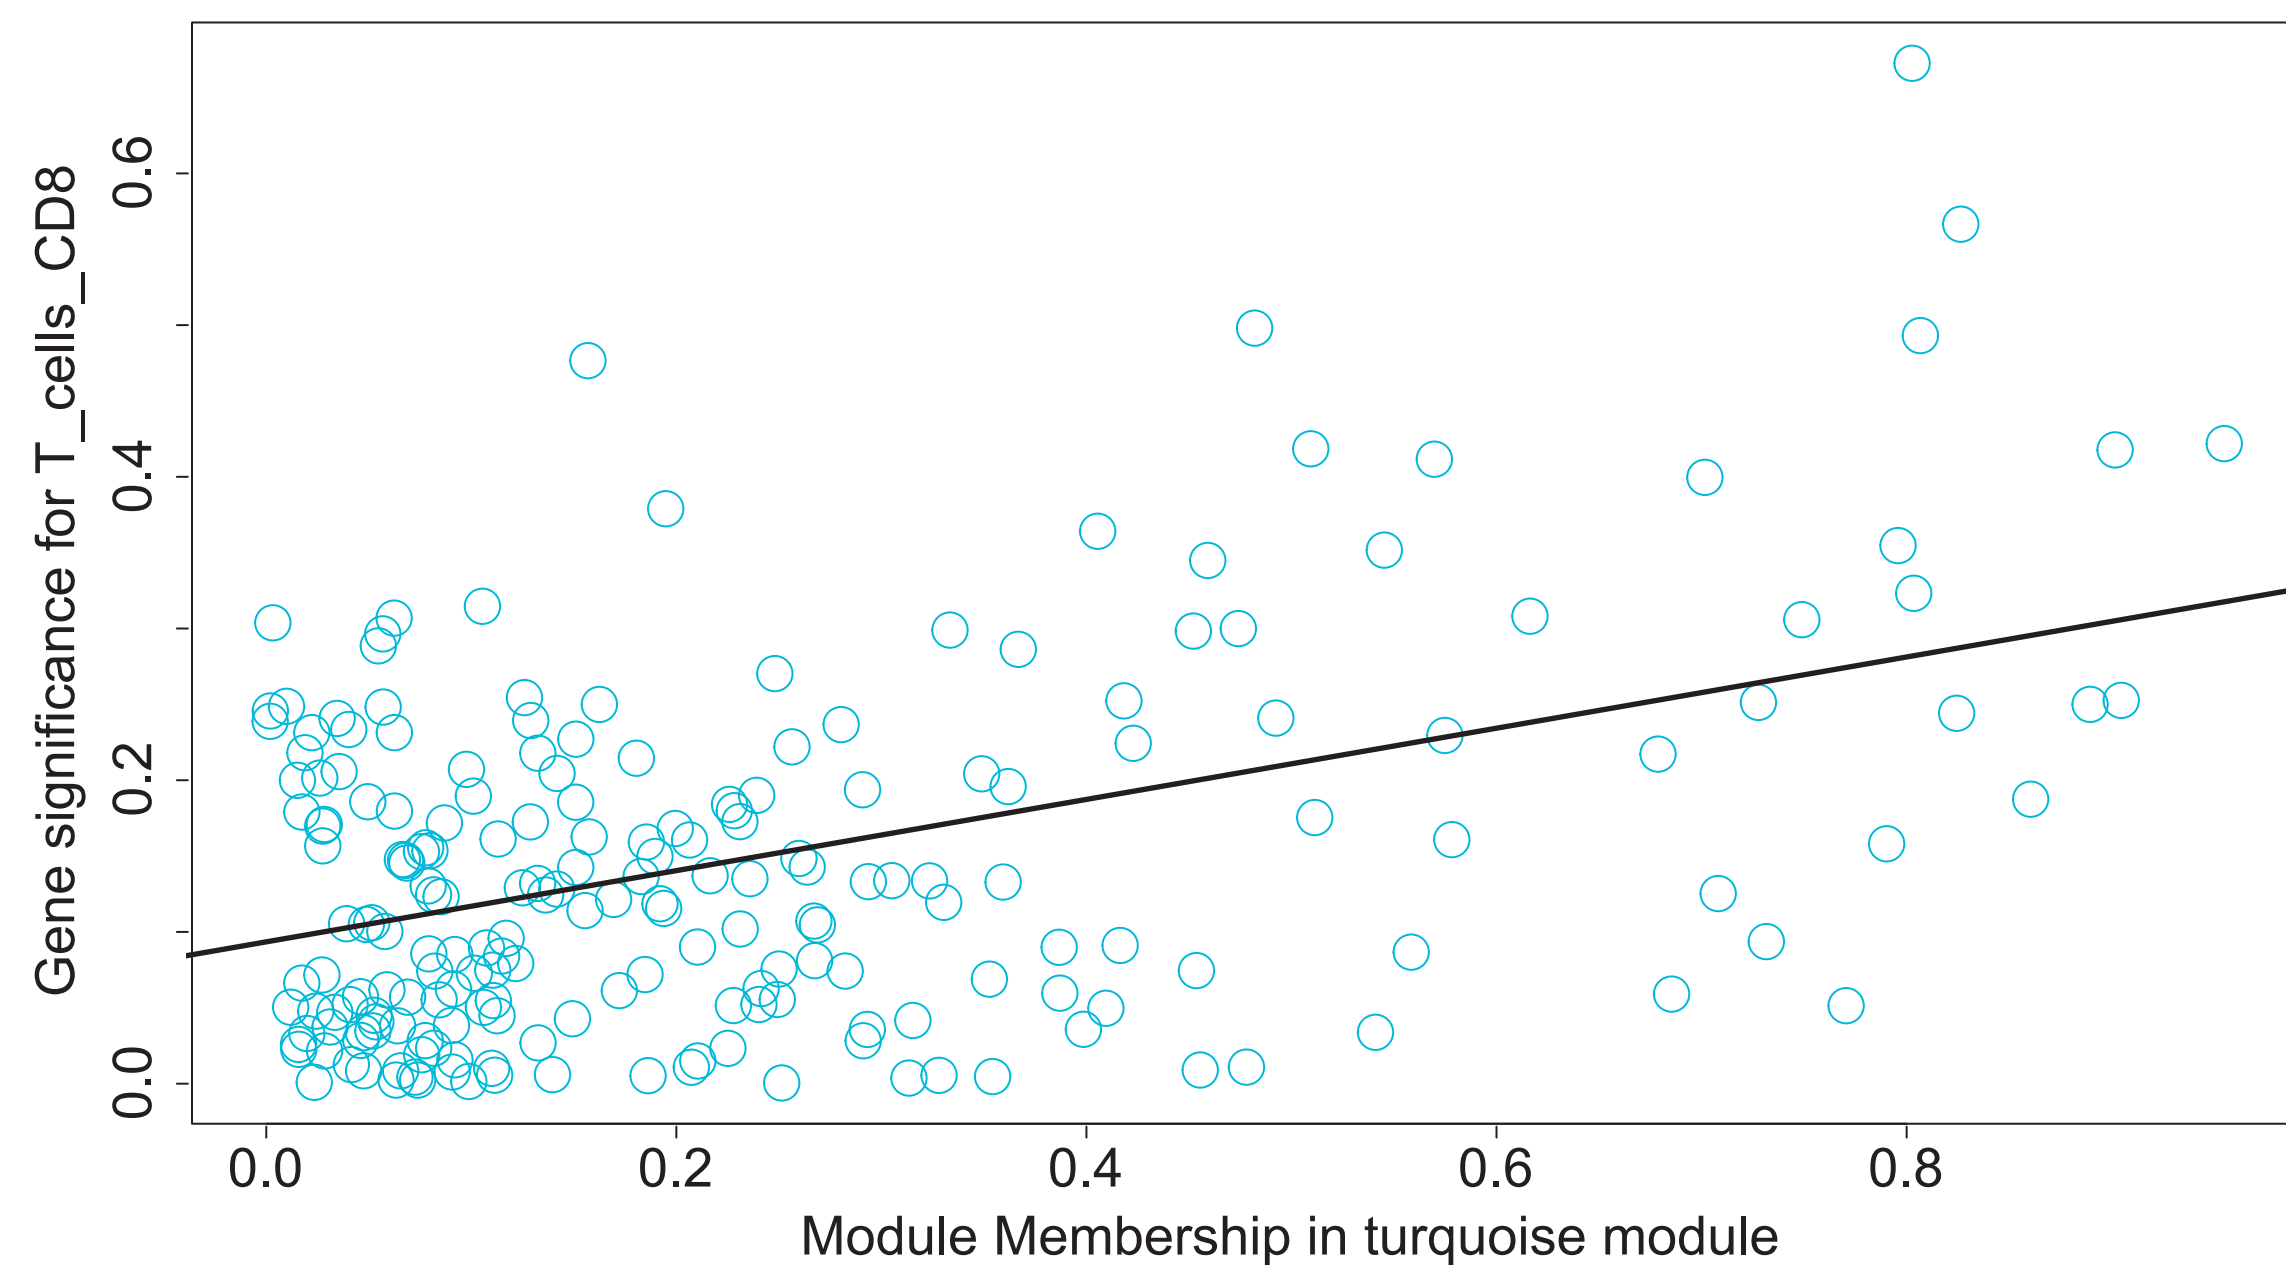**B**

Module membership vs gene significance  
cor=0.23, p=0.0049

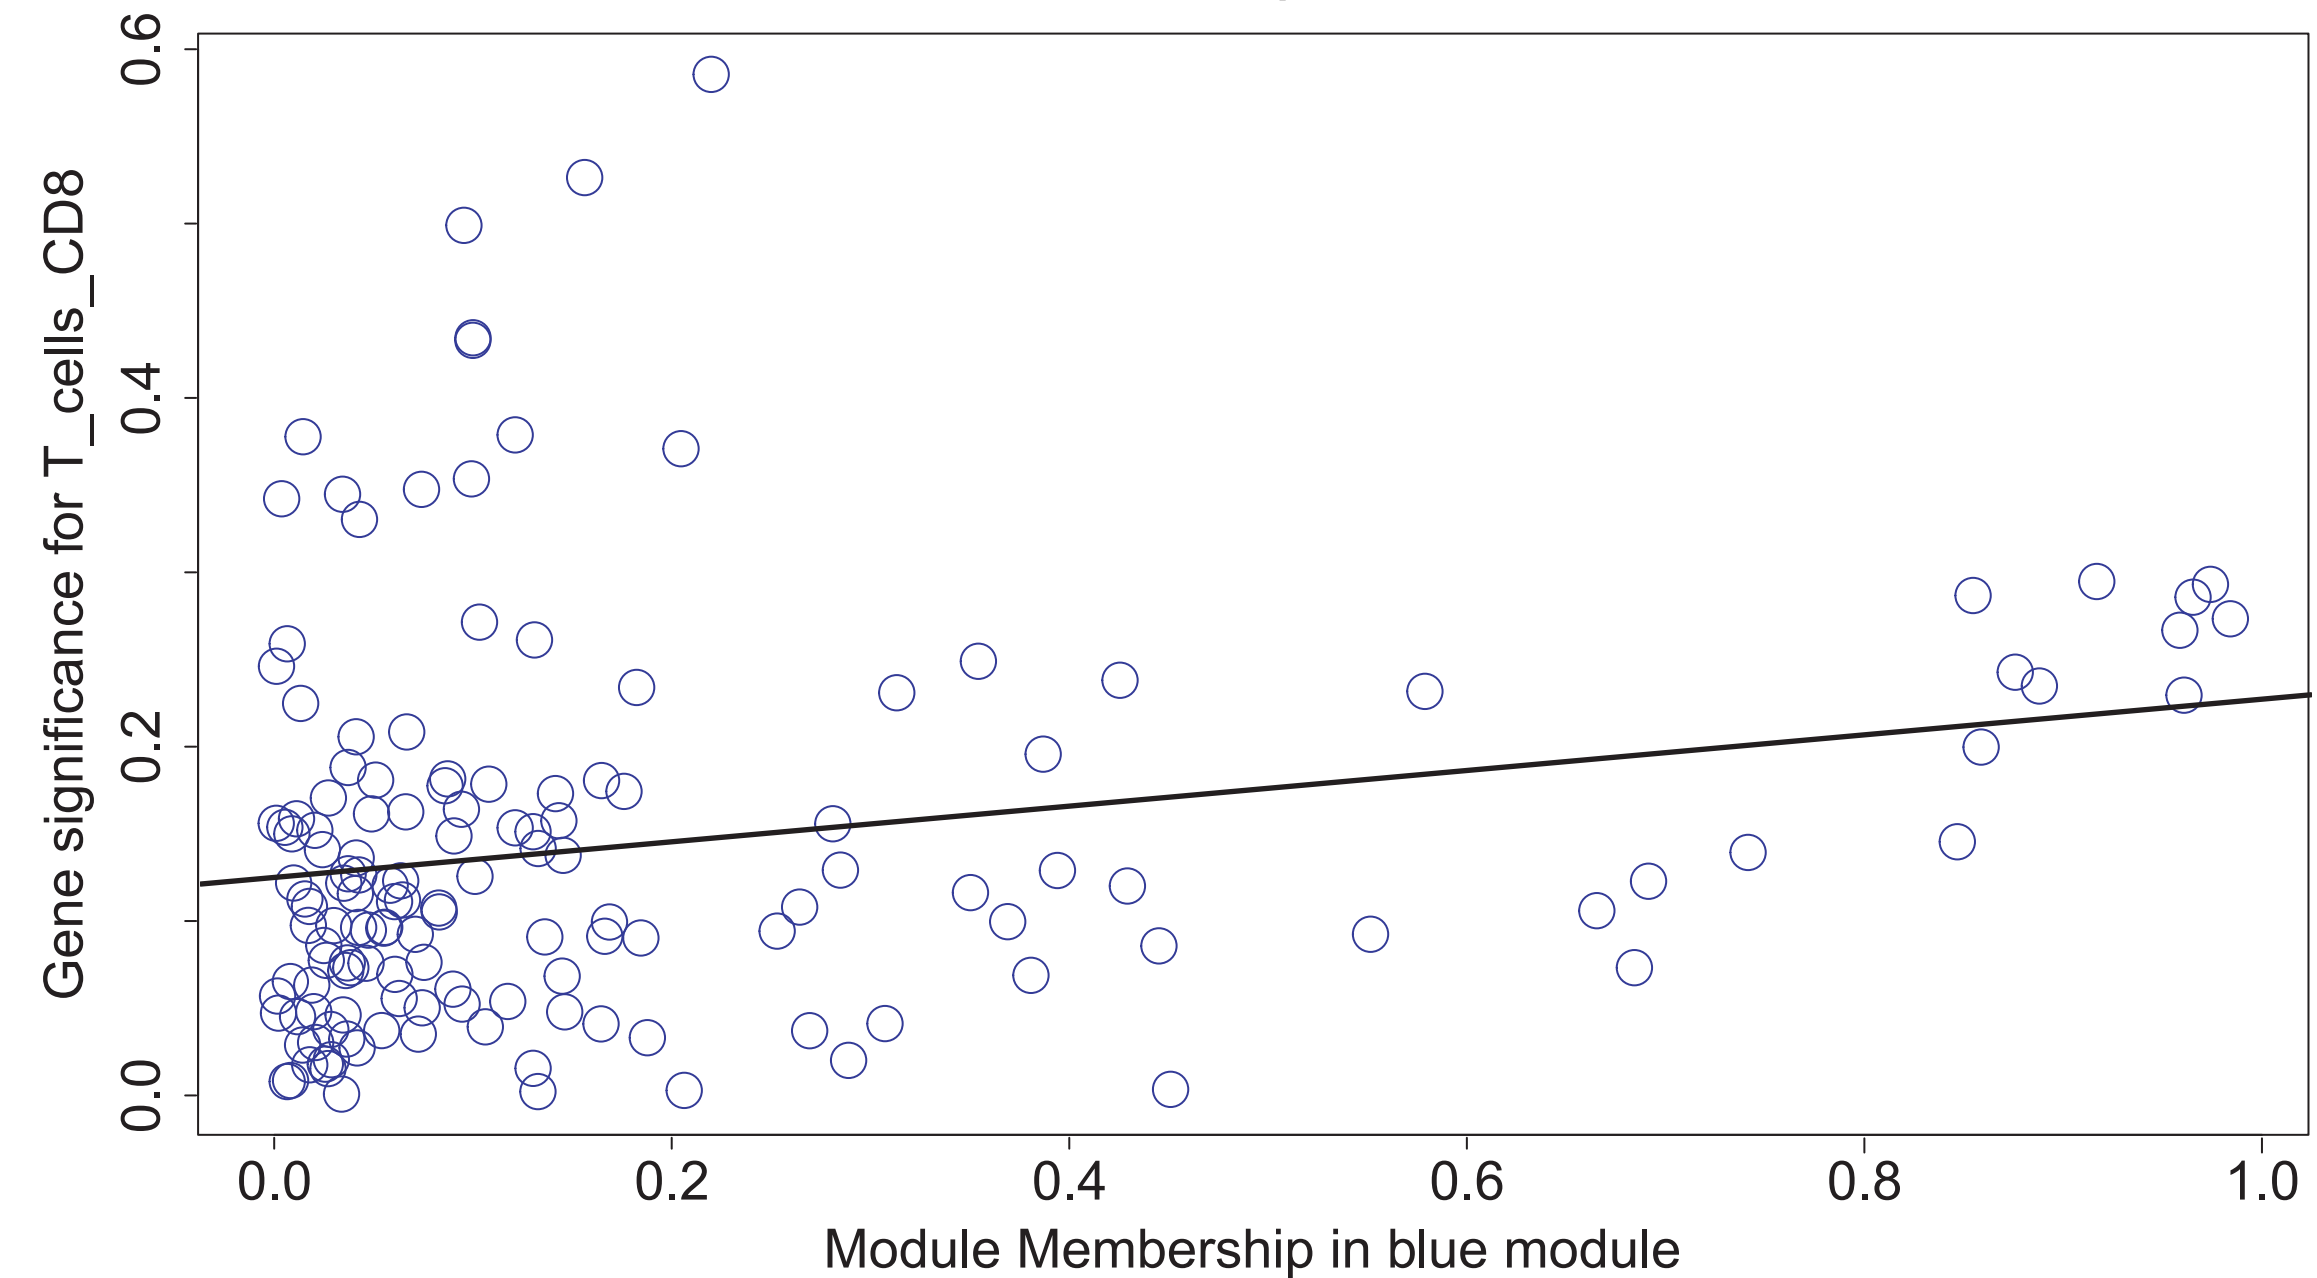**C**

Module membership vs gene significance  
cor=0.26, p=0.00014

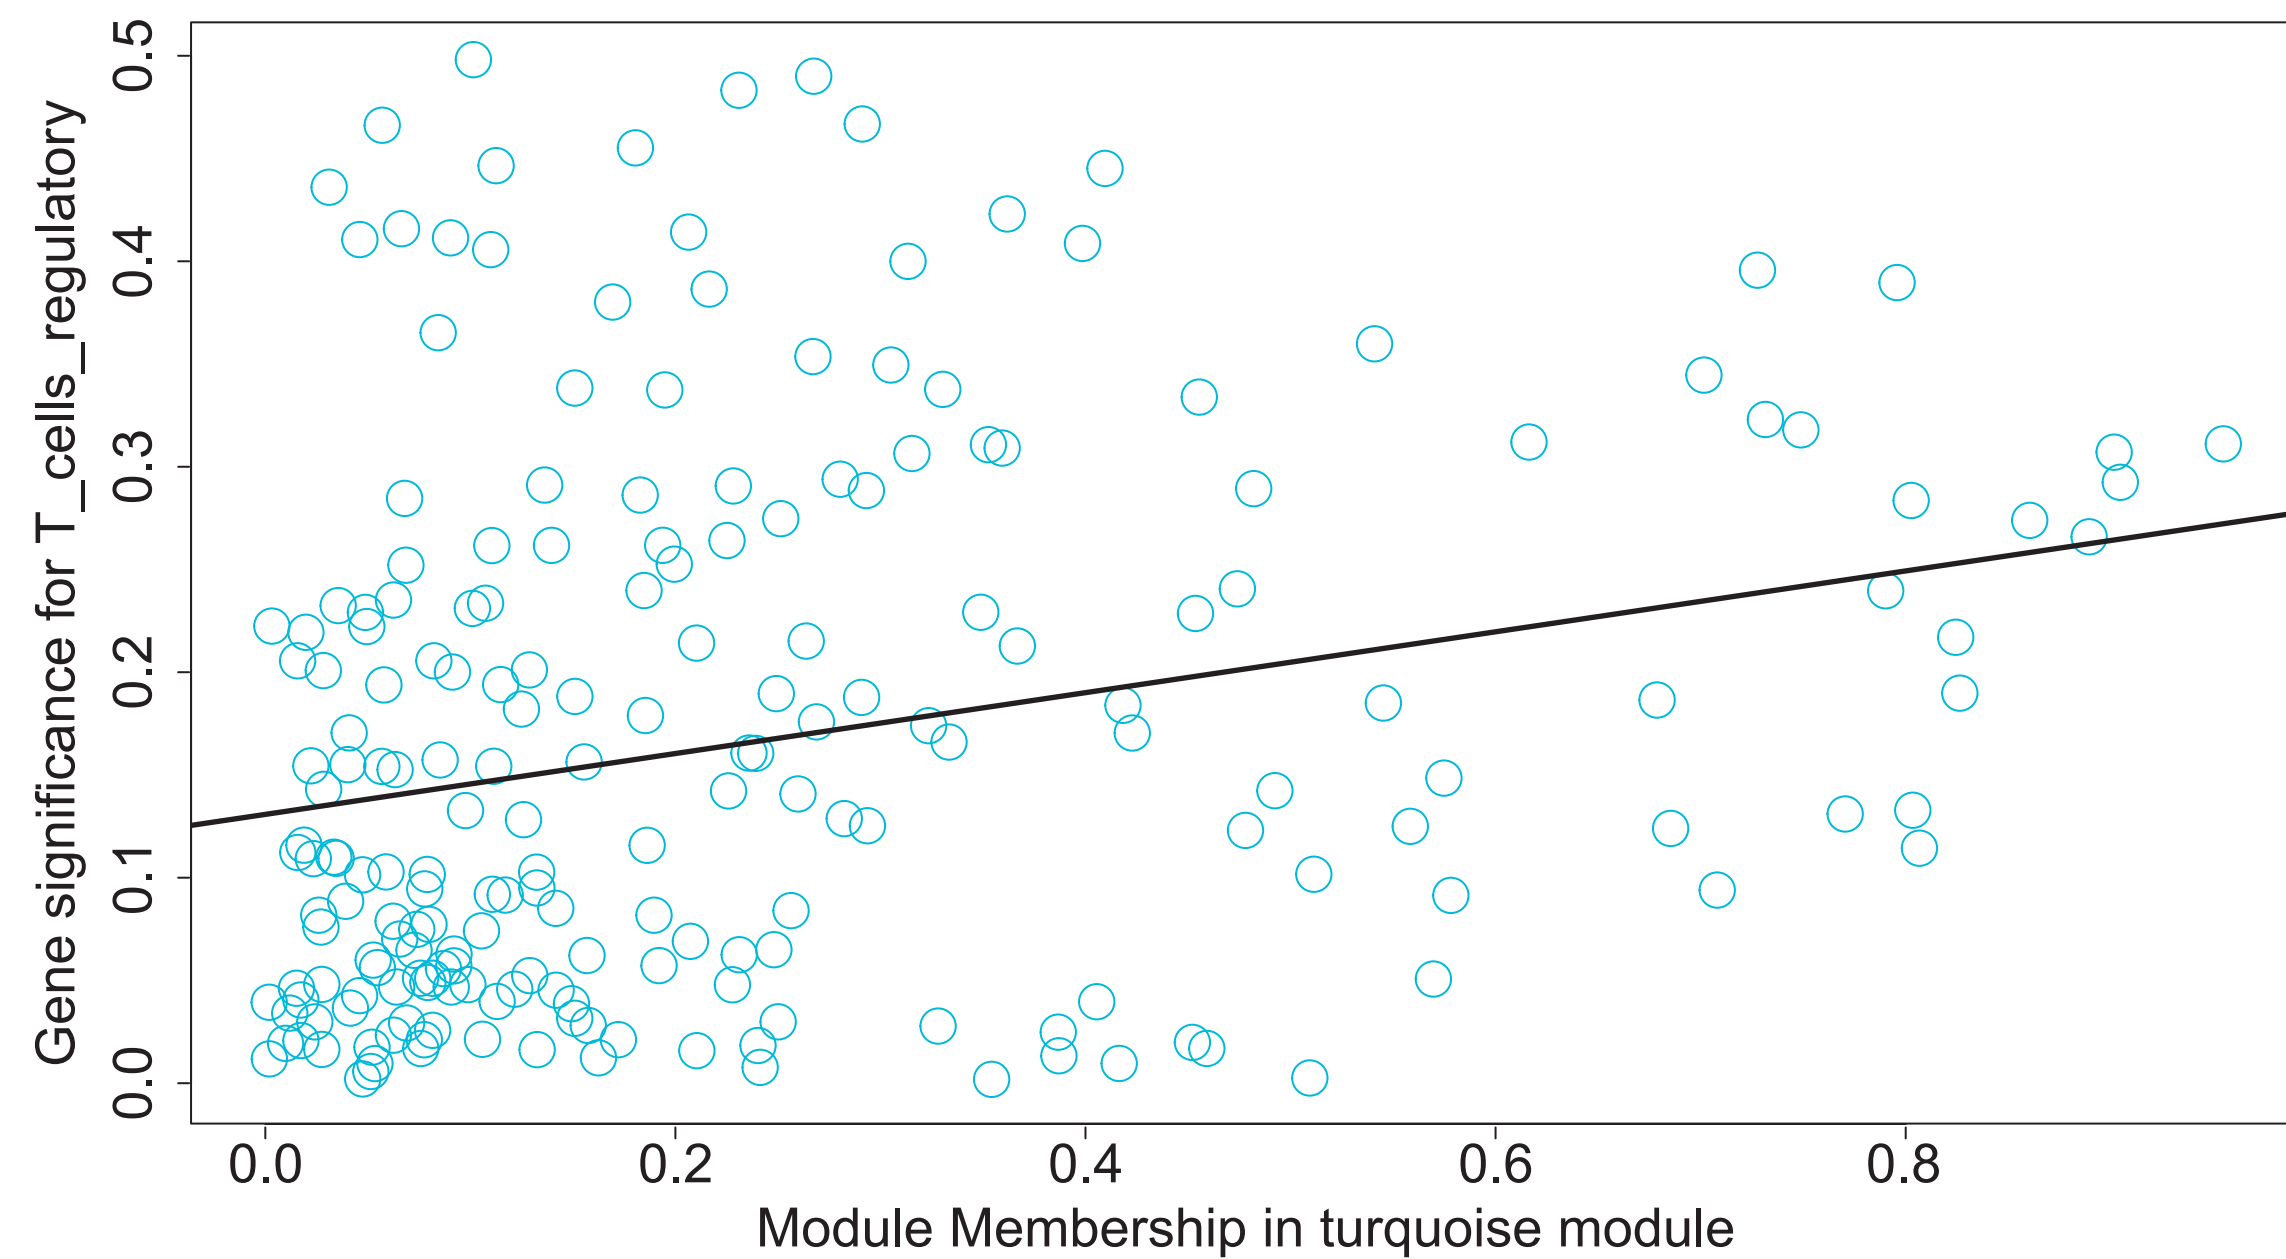**D**

Module membership vs gene significance  
cor=0.67, p=3e-15

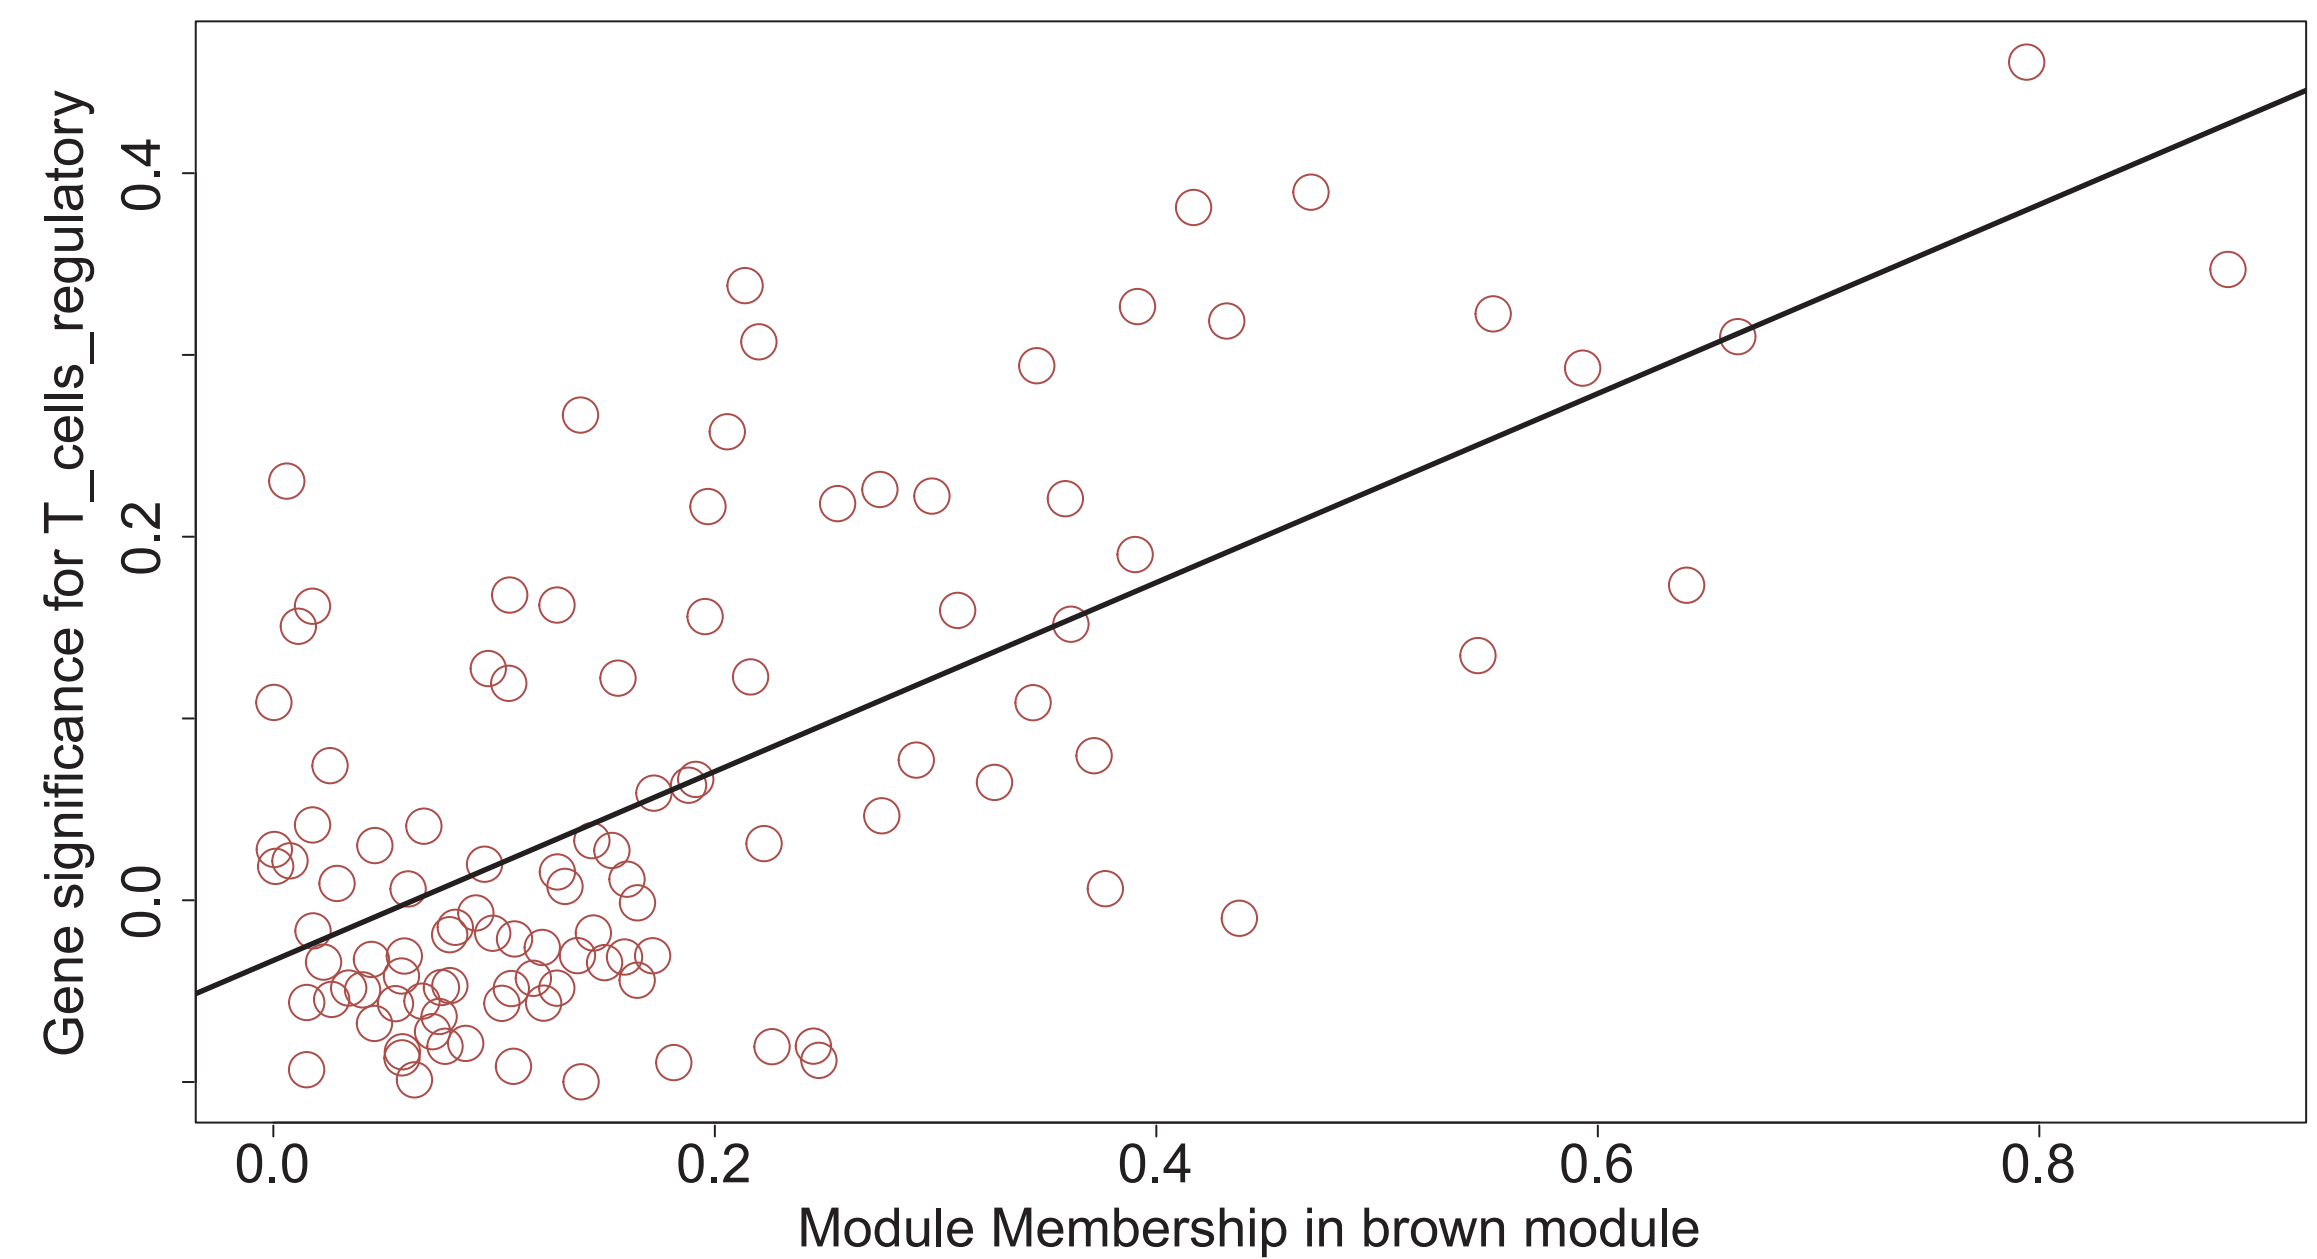

Supplement: f1 [file 1248024.f1.zip]
