# Supplementary figures and images for: TNFSF15 and MIA Variant Associated with Immunotherapy and Prognostic Evaluation in Esophageal Cancer
Source: Hindawi journal article supplement (doi:10.1155/2023/1248024), 2023-03-10

A

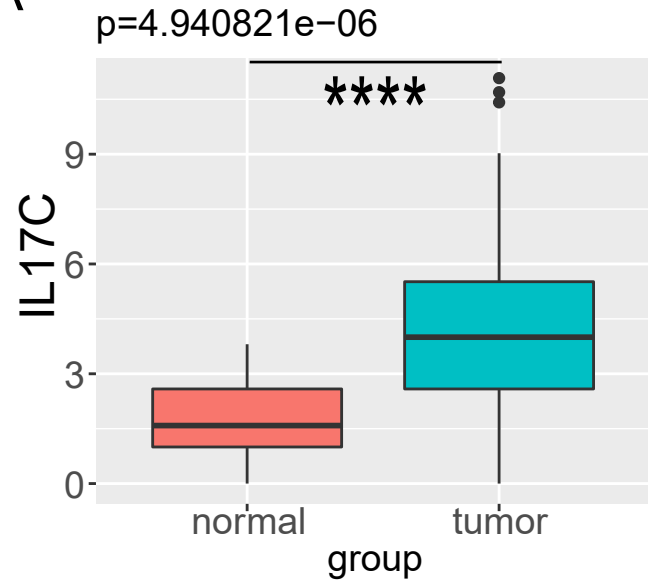

B

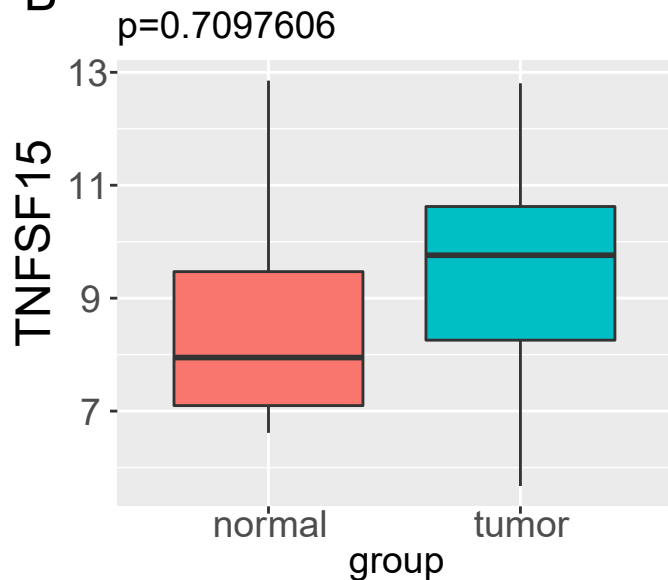

C

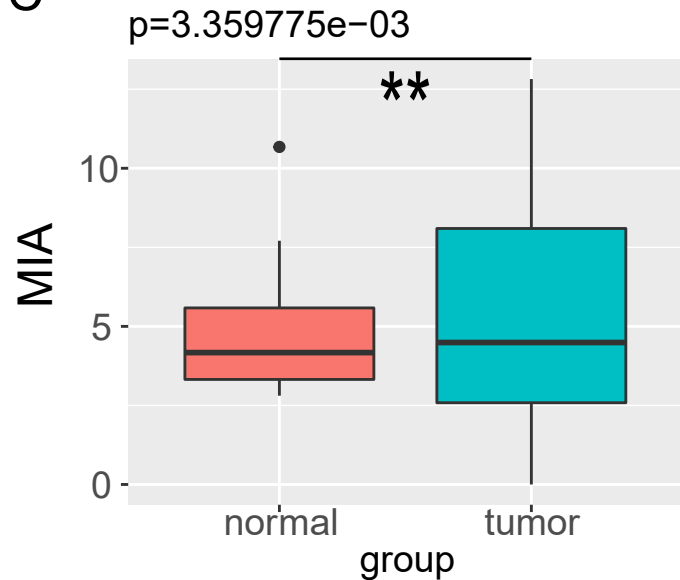

Supplement: f1 [file 1248024.f1.zip]
